# Supplementary material for: Enhanced electrocatalytic nitrogen reduction activity by incorporation of a carbon layer on SnS microflowers
Source: Royal Society of Chemistry journal article supplement (doi:10.1039/d0ta06576e), 2020-01-01
Supplement: d0ta06576e1.pdf [file d0ta06576e1.pdf]

1 *Supporting Information*

2 **Enhanced Electrocatalytic Nitrogen Reduction Activity by**  
3 **Incorporation of Carbon Layer on SnS Microflowers**

4 Weikang Yu,<sup>1,2</sup> Fenghao Shu,<sup>1</sup> Yifeng Huang,<sup>1</sup> Fangqi Yang,<sup>1</sup> Qiangguo Meng,<sup>1</sup> Zhi  
5 Zou,<sup>1</sup> Jun Wang,<sup>1\*</sup> Zheling Zeng,<sup>1</sup> Guifu Zou,<sup>2</sup> Shuguang Deng<sup>3\*</sup>

6

7

8 W. K. Yu, F. H. Shu, Y. f. Huang, F. Q. Yang, S. Zhu, Q. G. Meng, Z. Zou, Prof. J.  
9 Wang, Prof. Q. Deng, Prof. Z. L. Zeng, Prof. S. G. Deng

10 School of Resource, Environmental and Chemical Engineering, Nanchang University,  
11 No. 999 Xuefu Avenue, Jiangxi 330031, PR China

12 E-mail: jwang7@ncu.edu.cn (J. Wang)

13 E-mail: shuguang.deng@asu.edu (S. Deng)

14 W. K. Yu, Prof. G. F. Zou

15 Soochow Institute for Energy and Materials Innovations & Key Laboratory of  
16 Advanced Carbon Materials and Wearable Energy Technologies of Jiangsu Province,  
17 Soochow University, Suzhou 215006, PR China.

18 Prof. S. G. Deng

19 School for Engineering of Matter, Transport and Energy, Arizona State University, 551  
20 E.Tyler Mall, Tempe, AZ 85287, USA

21

22 \*Corresponding author:

23 E-mail: jwang7@ncu.edu.cn (J. Wang);

24 E-mail: shuguang.deng@asu.edu (S. Deng)

25

26

27

28

29

30 **Table of contents**

31 **Figure S1.** TEM images of SnS@C and SnS microflowers.....3

32 **Figure S2.** XRD patterns of SnS@C. ....3

33 **Figure S3.** High-resolution XPS spectra of Sn 3d and S 2p of SnS.....4

34 **Figure S4.** High-resolution XPS spectra of C 1s of SnS@C. ....4

35 **Figure S5.** N<sub>2</sub> adsorption-desorption isotherms of carbon layer, SnS@C and SnS.....5

36 **Figure S6.** I-U curves of the SnS@C and SnS. ....5

37 **Figure S7.** TGA curves of SnS@C and SnS.....6

38 **Figure S8.** Optical photograph of the two-compartment electrochemical cell. ....6

39 **Figure S9.** Determination of the produced ammonia in 0.1 M Na<sub>2</sub>SO<sub>4</sub>.....7

40 **Figure S10.** Determination of the produced hydrazine in 0.1 M Na<sub>2</sub>SO<sub>4</sub>. ....7

41 **Figure S11.** Determination of the produced ammonia in 0.1 M HCl. ....8

42 **Figure S12.** Determination of the produced ammonia in 0.1 M KOH.....8

43 **Figure S13.** Determination of the NO<sub>x</sub> in 0.1 M Na<sub>2</sub>SO<sub>4</sub>. ....8

44 **Figure S14.** The UV-Vis absorption spectra of the 0.1 M Na<sub>2</sub>SO<sub>4</sub> background and the  
45 purified N<sub>2</sub> treated 0.1 M Na<sub>2</sub>SO<sub>4</sub> solution .....9

46 **Figure S15.** Time-dependent current density curves for SnS@C. ....9

47 **Figure S16.** NH<sub>3</sub> yield rates and FEs of SnS at a series of potentials. ....10

48 **Figure S17.** Gas chromatography spectra showing the detection of CO and H<sub>2</sub>. ....10

49 **Figure S18.** NH<sub>3</sub> yield rates and FE of SnS@C at various potentials in 0.1 M HCl. .11

50 **Figure S19.** NH<sub>3</sub> yield rates and FE of SnS@C at various potentials in 0.1 M KOH 11

51 **Figure S20.** The electrolyte contact angle measurements of SnS.....12

52 **Figure S21.** The CVs curves of SnS@C and SnS .....12

53 **Figure S22.** Five consecutive NRR electrolysis cycles at  $-0.50$  V (vs. RHE) for 7200s  
54 in a  $0.1$  M  $\text{Na}_2\text{SO}_4$  solution. ....13

55 **Figure S23.** Recycling results of SnS at  $-0.50$  V (vs. RHE). ....13

56 **Figure S24.** XRD pattern of SnS@C before and after stability test. ....14

57 **Figure S25.** SEM images of SnS@C after stability test. ....14

58 **Figure S26.** The FE of SnS@C vs. reaction time at  $-0.5$  V. ....15

59 **Figure S27.** The structure diagram of SnS@C. ....15

60 **Figure S28.** Space-filling geometric structures of various intermediates of NRR  
61 pathway on SnS@C (111) surface. ....16

62 **Figure S29.** Free-energy diagrams of NRR process on SnS (111) surface.....16

63 **Figure S30.** Free-energy diagrams of HER process on SnS@C and SnS.....17

64 **Figure S31.** Top view of charge density difference of SnS@C and charge density  
65 difference of SnS@C after  $\text{N}_2$  adsorption on SnS (111) surface.....17

66 **Figure TS1.** The correction of zero point energy, enthalpy effect and entropy effect of  
67 the adsorbed and gaseous species.....18

68 **Figure TS2.** Chemical compositions of SnS and SnS@C samples. ....19

69 **Figure TS3.** Chemical composition determined by elemental analyzer. ....19

70 **Figure TS4.** Simulated values of fitted equivalent circuit resistances of SnS and  
71 SnS@C.....19

72 **Figure TS5.** The comparable table of state-of-the-art NRR catalysts.....20

73 **Reference** .....21

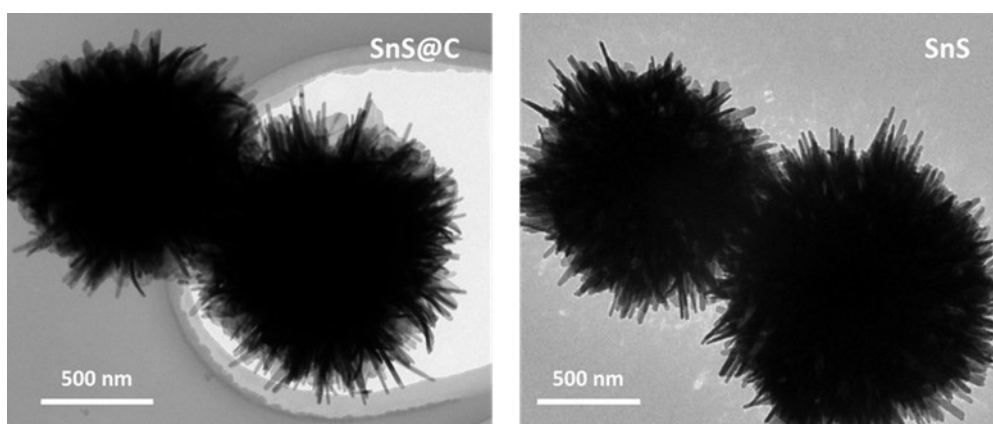

74  
75  
76

**Figure S1.** TEM images of SnS@C and SnS microflowers.

77

78

79

80

81

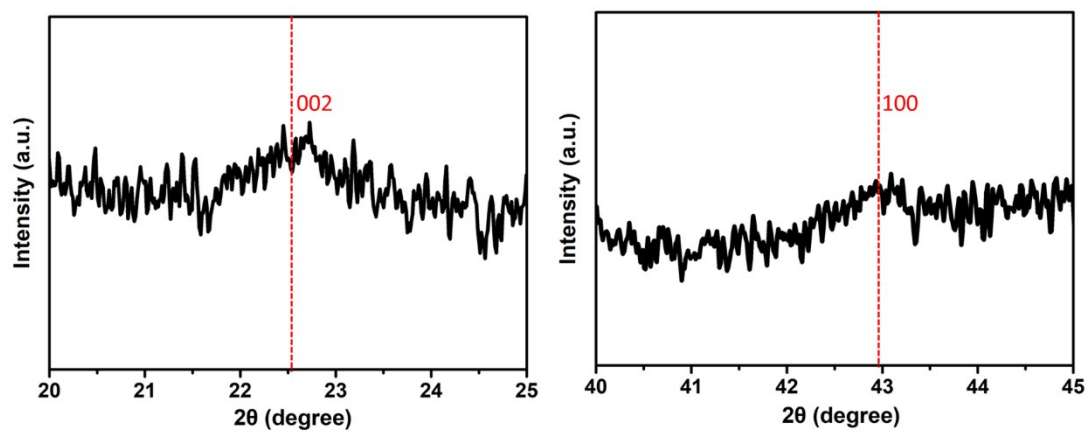

82

83

**Figure S2.** XRD patterns of SnS@C.

84

85

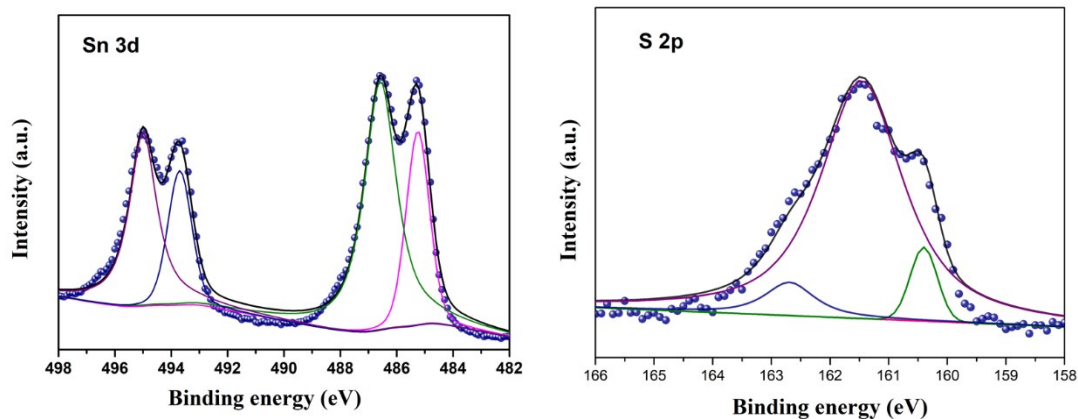

86

87

**Figure S3.** High-resolution XPS spectra of Sn 3d and S 2p on SnS.

88

89

90

91

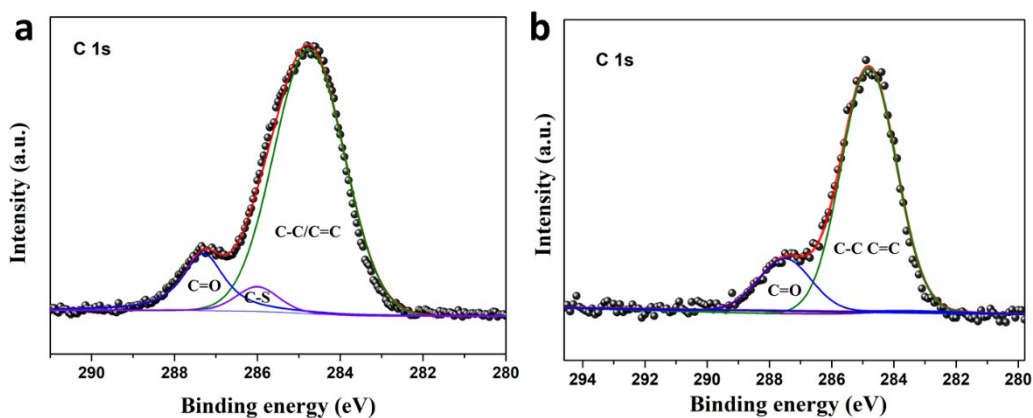

92

93

**Figure S4.** High-resolution XPS spectra of C 1s of a) SnS@C and b) SnS.

94

95

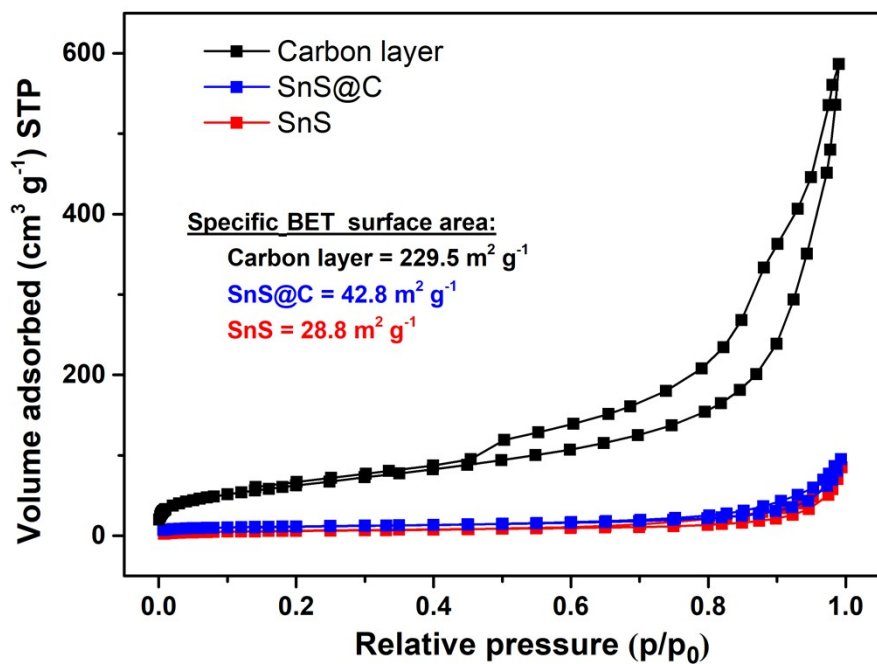

96

97 **Figure S5.** N<sub>2</sub> adsorption-desorption isotherms of the carbon layer, SnS@C, and SnS  
 98 at 77 K.

99

100

101

102

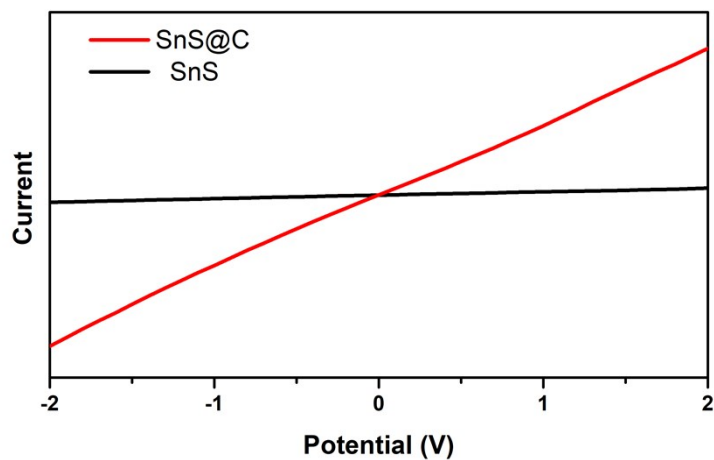

103

104

**Figure S6.** I-U curves of SnS@C and SnS at room temperature.

105

106

107

108

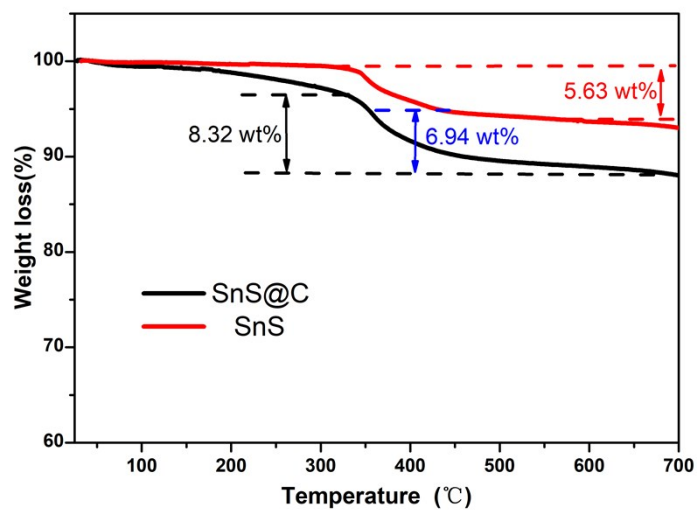

109

110

111

112

113

**Figure S7.** TGA curves of SnS@C and SnS under an Ar-air atmosphere.

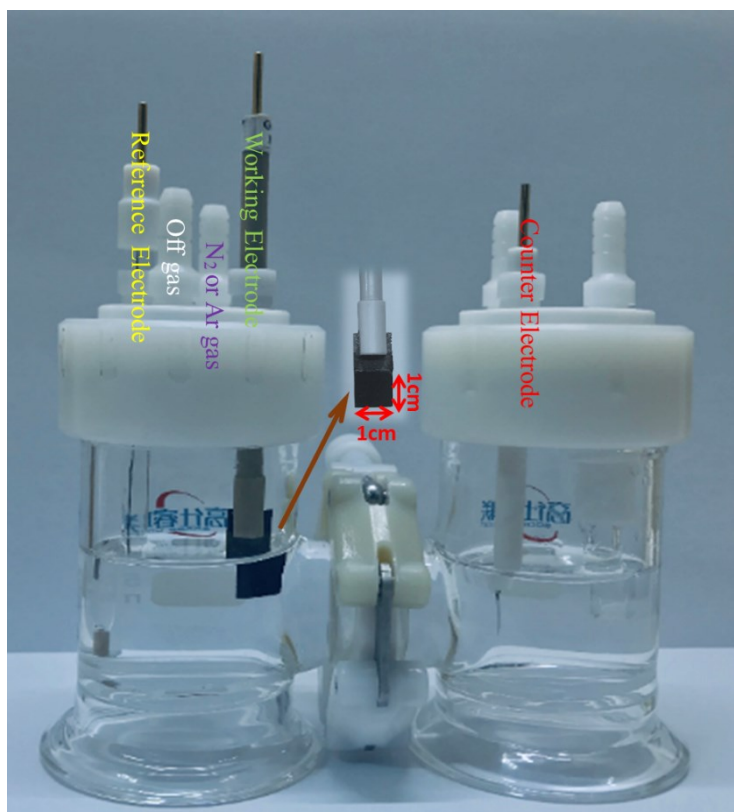

114

115 **Figure S8.** Optical photograph of the gas-tight three-electrode configured two-  
116 compartment electrochemical cell.

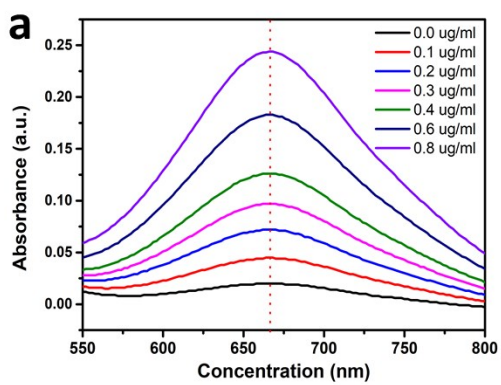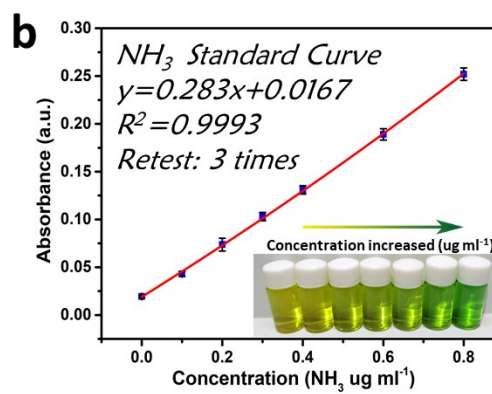

117



118 **Figure S9.** Determination of the produced ammonia in 0.1 M Na<sub>2</sub>SO<sub>4</sub>. (a) UV-Vis  
 119 absorption spectra of various NH<sub>3</sub> concentrations after avoid light incubated for 1 h at  
 120 room temperature. (b) Corresponding calibration curves for the colorimetric NH<sub>3</sub> assay

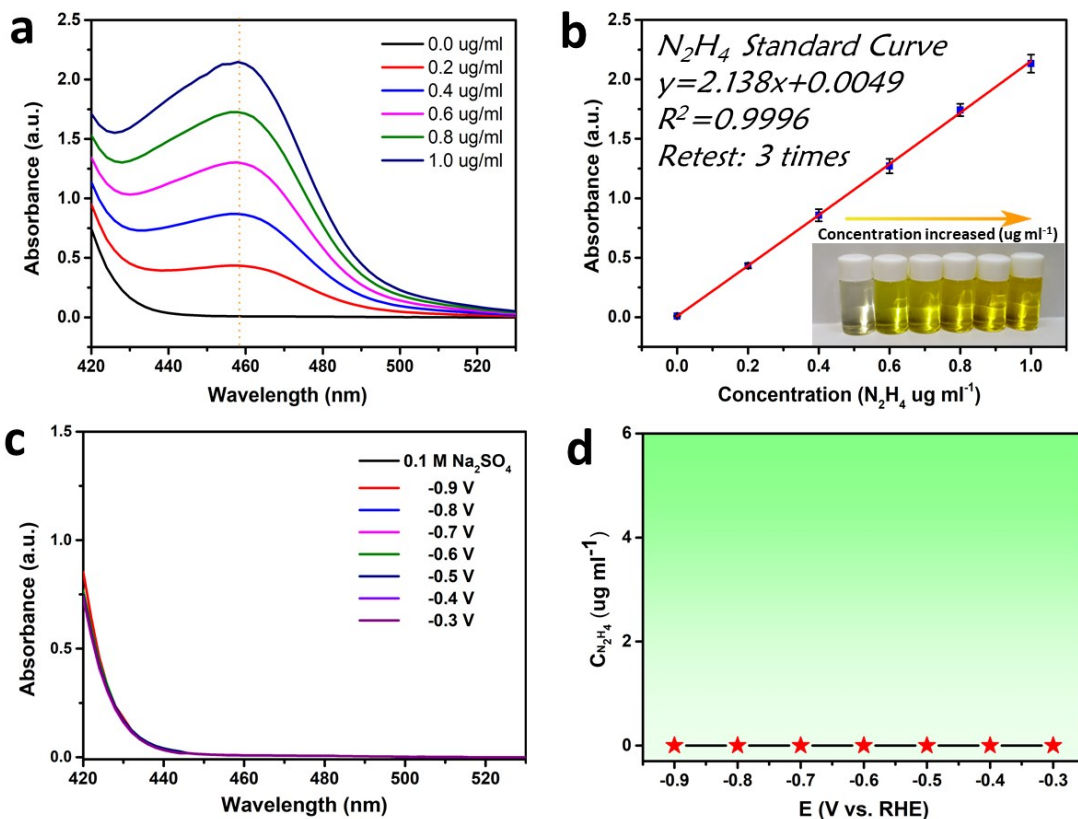

121 using the indophenol blue method.

122 **Figure S10.** Determination of the produced hydrazine in 0.1 M Na<sub>2</sub>SO<sub>4</sub>. (a) UV-Vis  
 123 absorption spectra of various N<sub>2</sub>H<sub>4</sub>SO<sub>4</sub> concentrations after incubated for 20 min at room  
 124 temperature. (b) Corresponding calibration curves for the colorimetric N<sub>2</sub>H<sub>4</sub> assay  
 125 using the Watt-Chrisp method. (c) UV-Vis absorption spectra of the electrolytes stained  
 126 with the Watt-Chrisp method before and after 7200s electrolysis at a series of potentials  
 127 using SnS@C as the working electrode. (d) N<sub>2</sub>H<sub>4</sub> concentrations at corresponding  
 128 potentials.

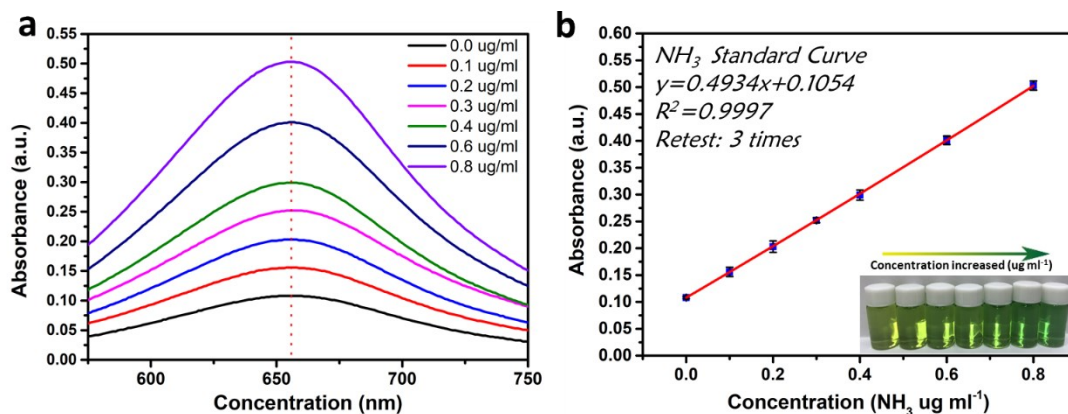

129

130 **Figure S11.** Determination of the produced ammonia in 0.1 M HCl. (a) UV-Vis  
 131 absorption spectra of various NH<sub>3</sub> concentrations after avoid light incubated for 2 h at  
 132 room temperature. (b) Corresponding calibration curves for the colorimetric NH<sub>3</sub> assay  
 133 using the indophenol blue method.

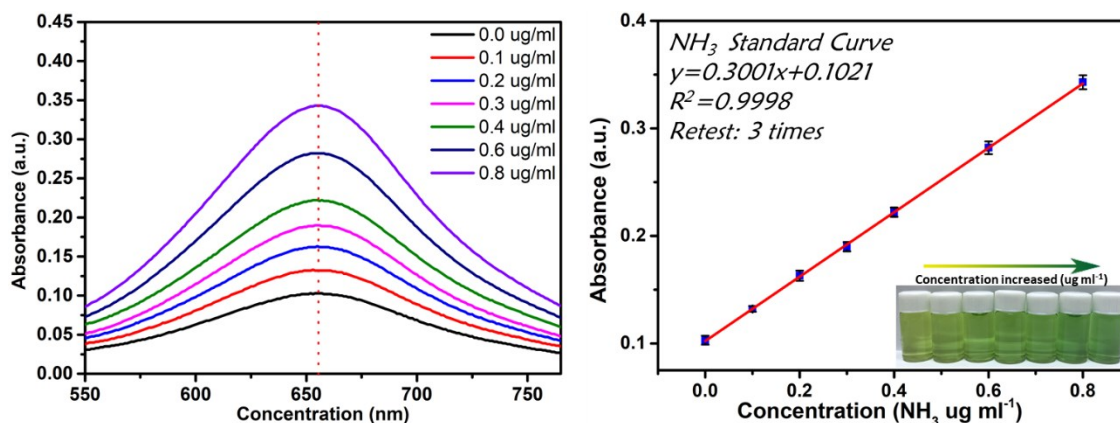

134

135 **Figure S12.** Determination of the produced ammonia in 0.1 M KOH. (a) UV-Vis  
 136 absorption spectra of various NH<sub>3</sub> concentrations after avoid light incubated for 2 h at  
 137 room temperature. (b) Corresponding calibration curves for the colorimetric NH<sub>3</sub> assay  
 138 using the indophenol blue method.

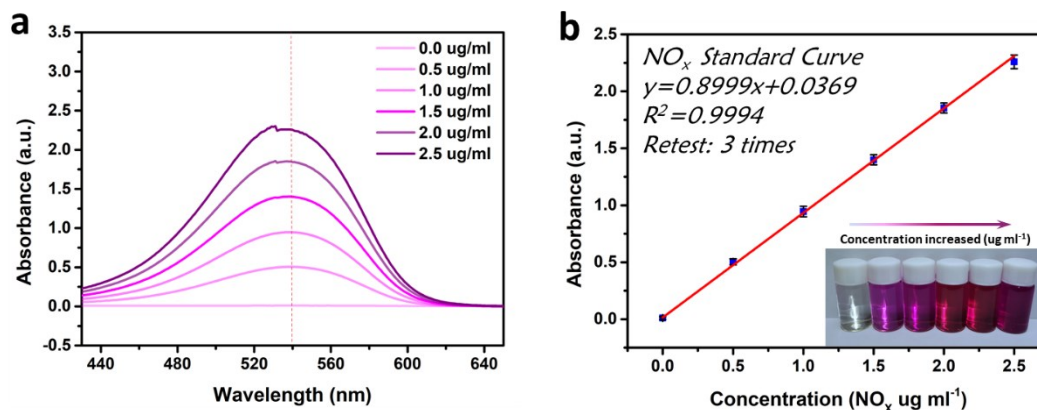

139

140 **Figure S13.** Determination of the NO<sub>x</sub> in 0.1 M Na<sub>2</sub>SO<sub>4</sub>. (a) UV-Vis absorption spectra  
 141 of various NO<sub>x</sub> concentrations after incubated for 20 min at room temperature. (b)  
 142 Corresponding calibration curves for the colorimetric NO<sub>x</sub> assay using the N-(1-  
 143 naphthyl) ethylenediamine dihydrochloride spectrophotometric method.

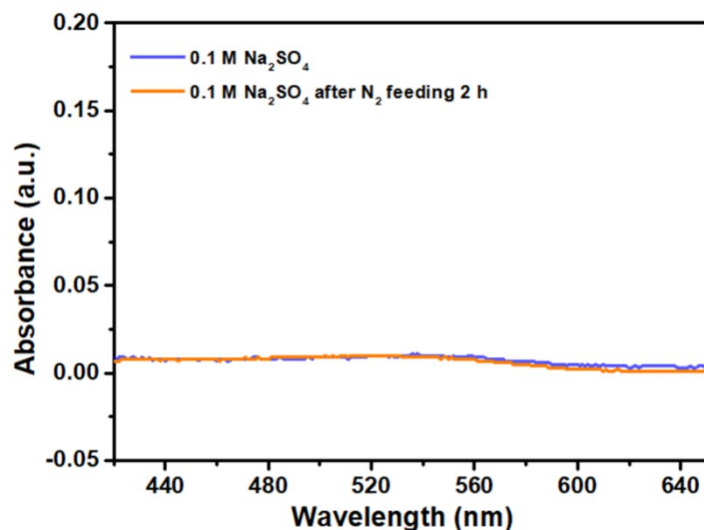

144

145 **Figure S14.** The UV-Vis absorption spectra of the 0.1 M Na<sub>2</sub>SO<sub>4</sub> background and the  
 146 purified N<sub>2</sub> treated 0.1 M Na<sub>2</sub>SO<sub>4</sub> solution using an N-(1-naphthyl) ethylenediamine  
 147 dihydrochloride spectrophotometric method. The results show that no NO<sub>x</sub> exists in the  
 148 purified gas.

149

150

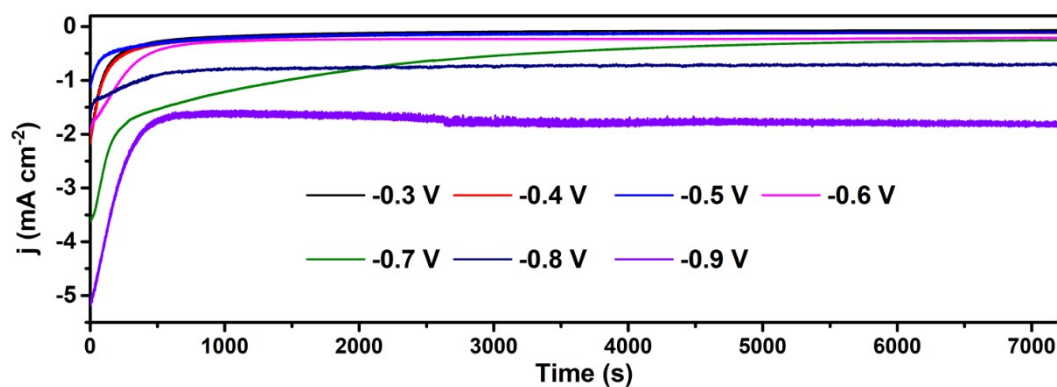

151

152

153 **Figure S15.** Time-dependent current density curves for SnS@C at the corresponding  
 154 different potentials for 7200 s in 0.1 M Na<sub>2</sub>SO<sub>4</sub> solution.

155

156

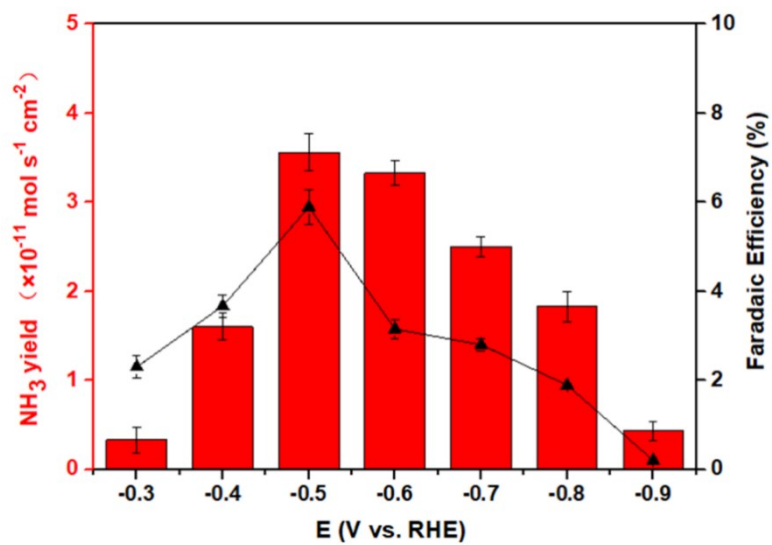

157

158 **Figure S16.** NH<sub>3</sub> yield rates and FEs of SnS at a series of potentials.

159

160

161

162

163

164

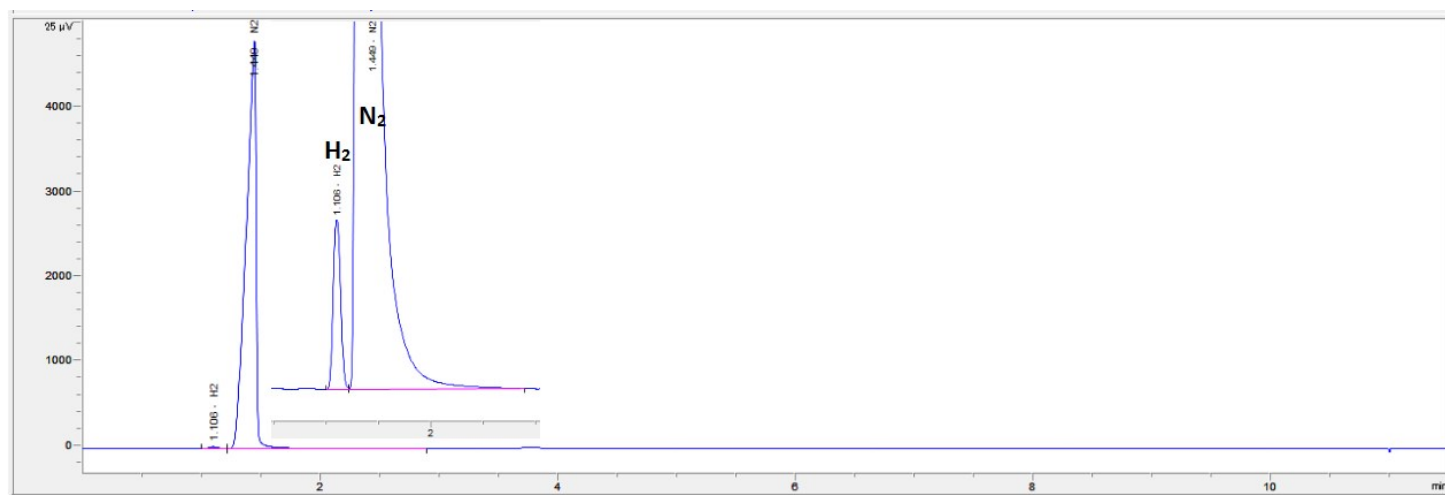

165

166 **Figure S17.** Gas chromatography spectra showing the detection of CO and H<sub>2</sub>.

167

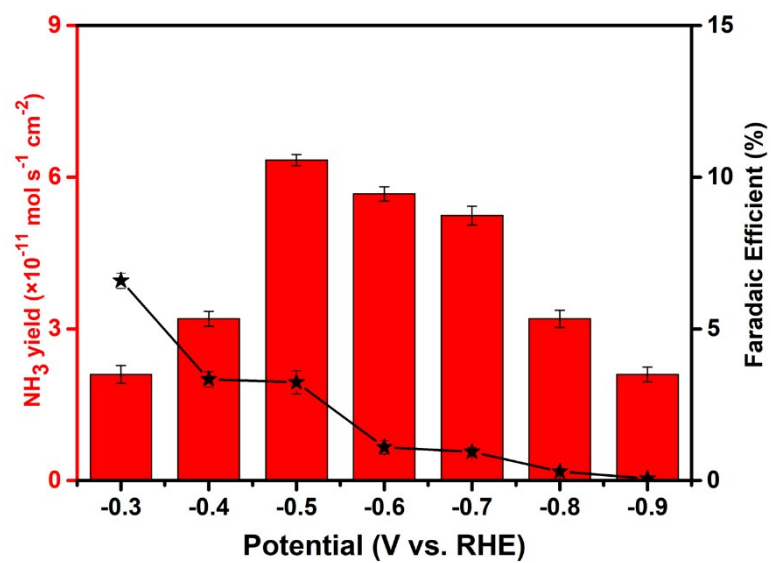

168

169 **Figure S18.** NH<sub>3</sub> yield rates and FE of SnS@C at various potentials in 0.1 M HCl.

170

171

172

173

174

175

176

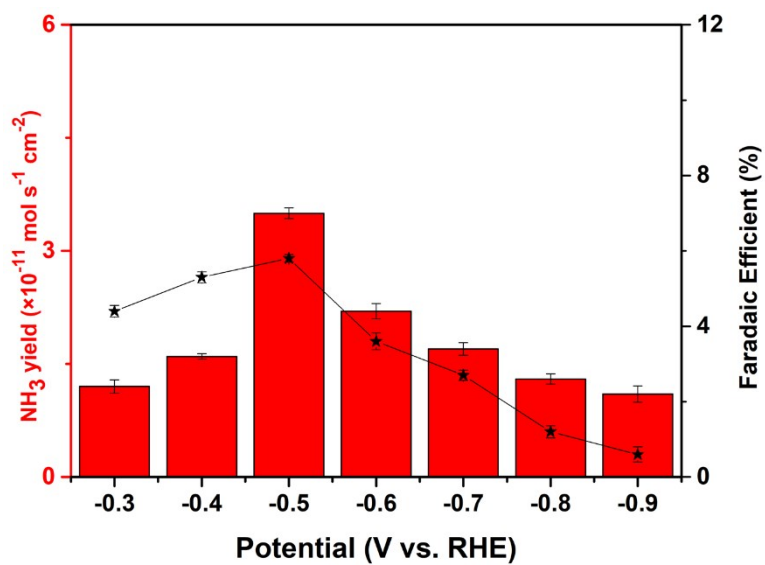

177

178 **Figure S19.**  $\text{NH}_3$  yield rates and FE of SnS@C at various potentials in 0.1 M KOH.

179

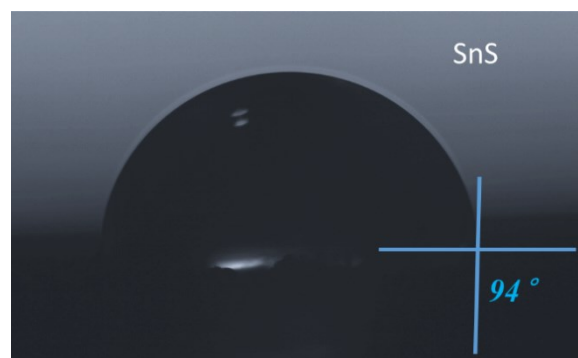

180

181 **Figure S20.** The electrolyte contact angle measurements of SnS.

182

183

184

185

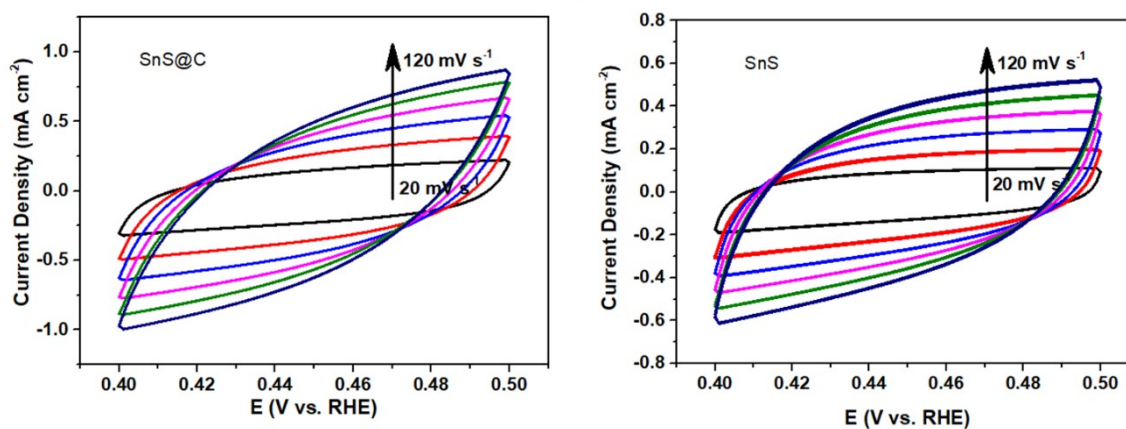

186

187 **Figure S21.** The CV curves of SnS@C and SnS collected at different scanning rates  
188 from 20 to 120 mV s<sup>-1</sup>.

189

190

191

192

193

194

195

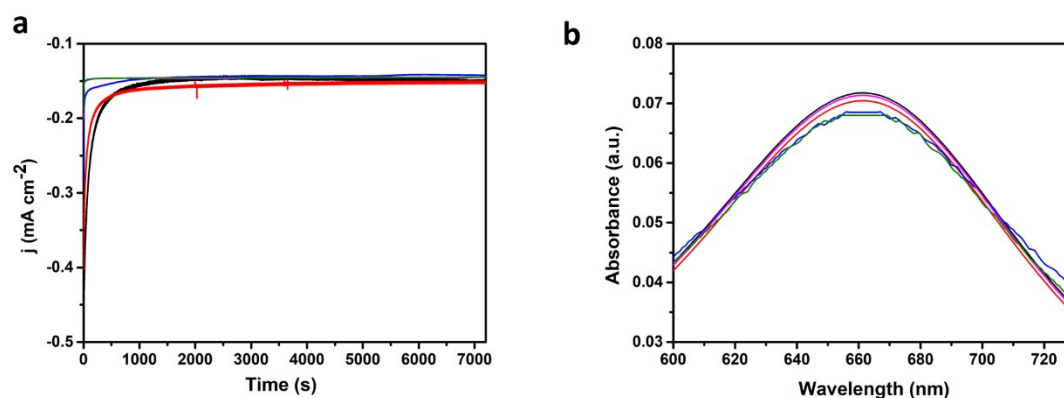

196

197 **Figure S22.** Five consecutive NRR electrolysis cycles at  $-0.50$  V (vs. RHE) for 7200s  
198 in a  $0.1$  M  $\text{Na}_2\text{SO}_4$  solution. (a) Time-dependent current density curves of SnS@C. (b)  
199 UV-Vis absorption spectra of the electrolytes stained with the indophenol blue method  
200 (obtained by repeating electrolysis 5 times).

201

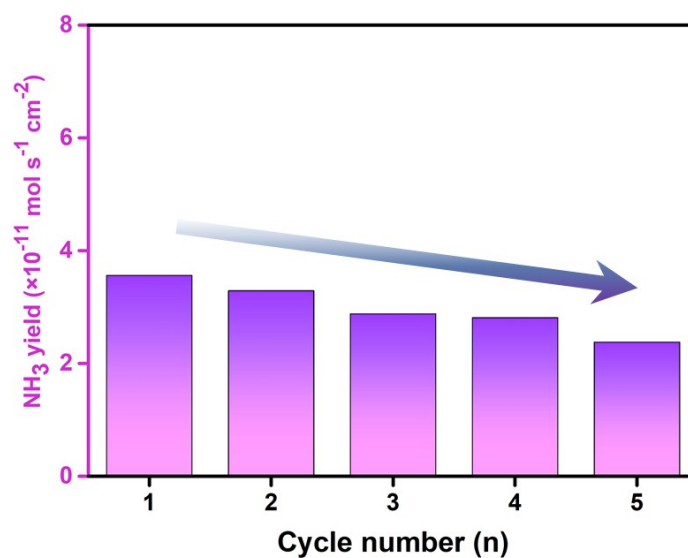

202

203 **Figure S23.** Recycling performances of SnS at  $-0.50$  V (vs. RHE).

204

205

206

207

208



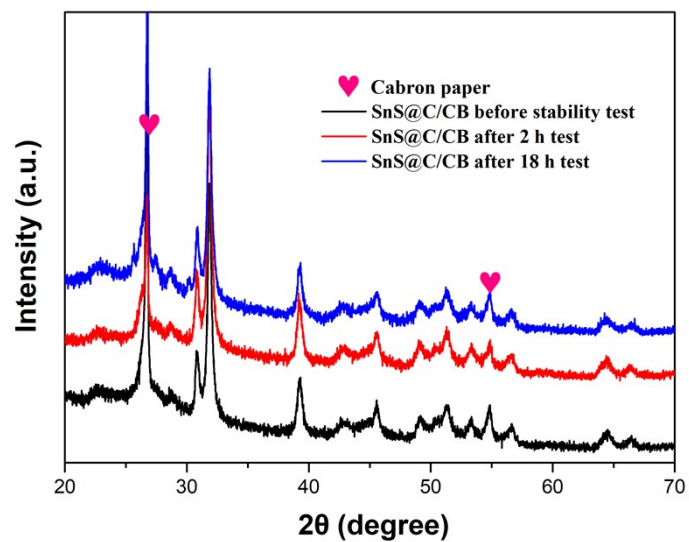

**Figure S24.** XRD pattern of SnS@C before and after stability test.

209  
210  
211  
212  
213  
214  
215

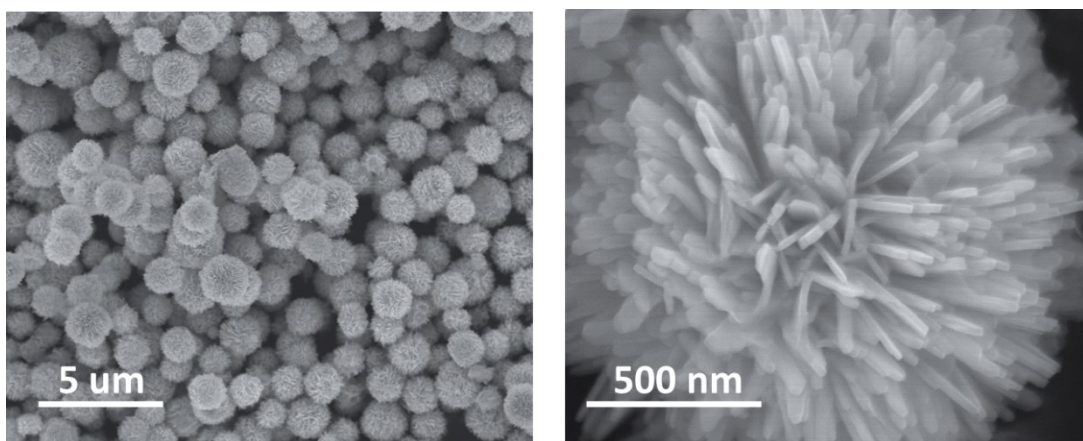

**Figure S25.** SEM images of SnS@C after stability test.

216  
217  
218  
219  
220



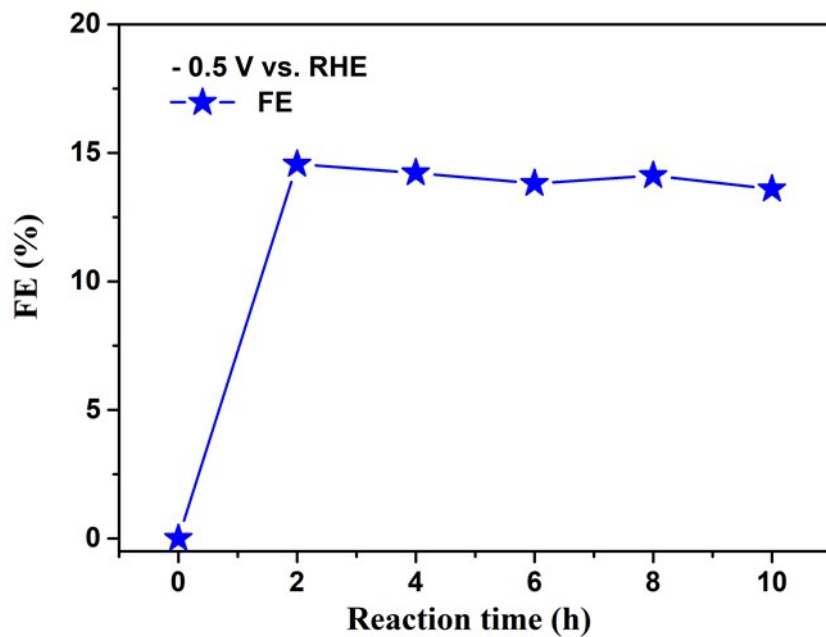

221

222

**Figure S26.** The FE of SnS@C vs. reaction time at -0.5 V.

223

224

225

226

227

228

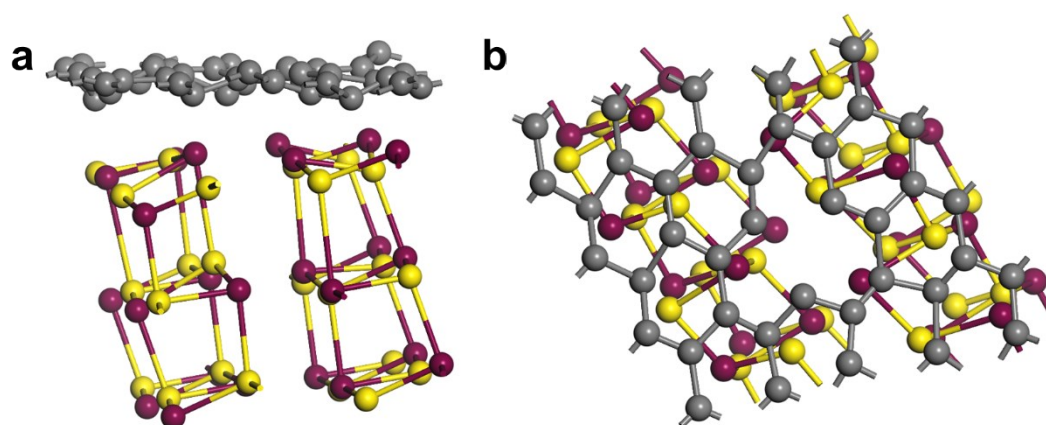

229 **Figure S27.** a) The structure diagram of SnS@C; b) Top view of SnS@C (The gray,  
230 chocolate and yellow balls represent C, Sn, and S, respectively)

231

232

233

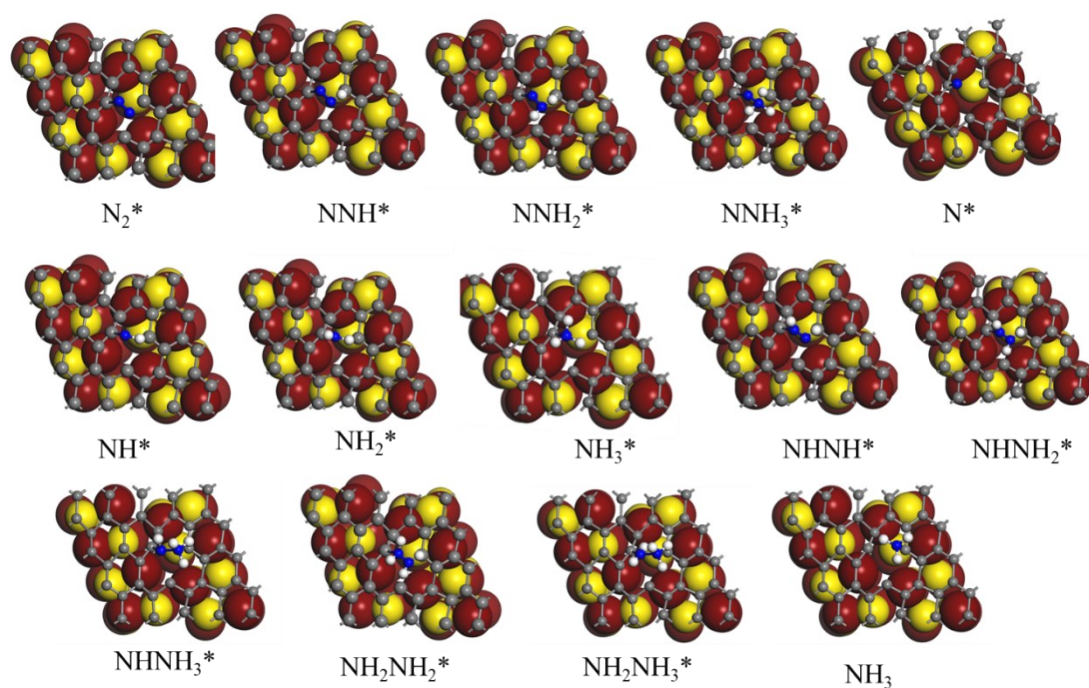

234

235

236

237

238 **Figure S28.** Space-filling geometric structures of various intermediates of the NRR  
239 pathway on the SnS@C (111) surface. (The gray, white, blue, chocolate and yellow  
240 balls represent C, H, N, Sn and S, respectively)

241

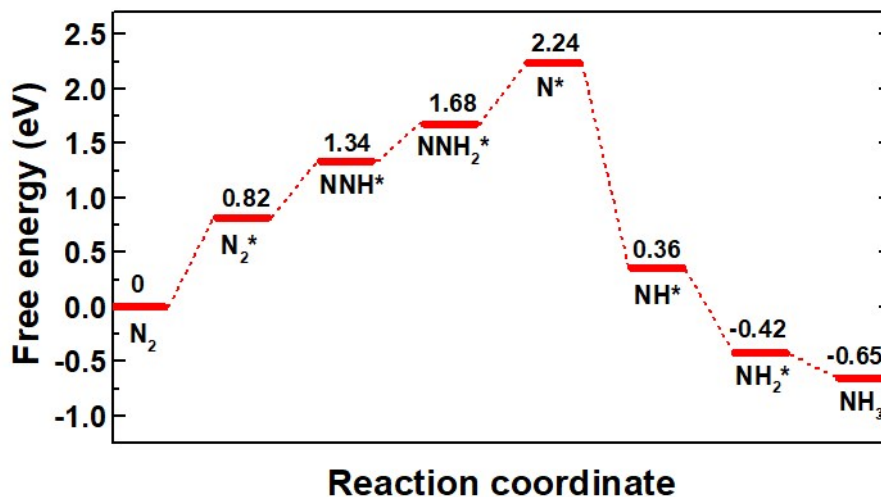

242

243 **Figure S29.** Free-energy diagrams of NRR process on SnS (111) surface (\* denotes the  
244 adsorption site)

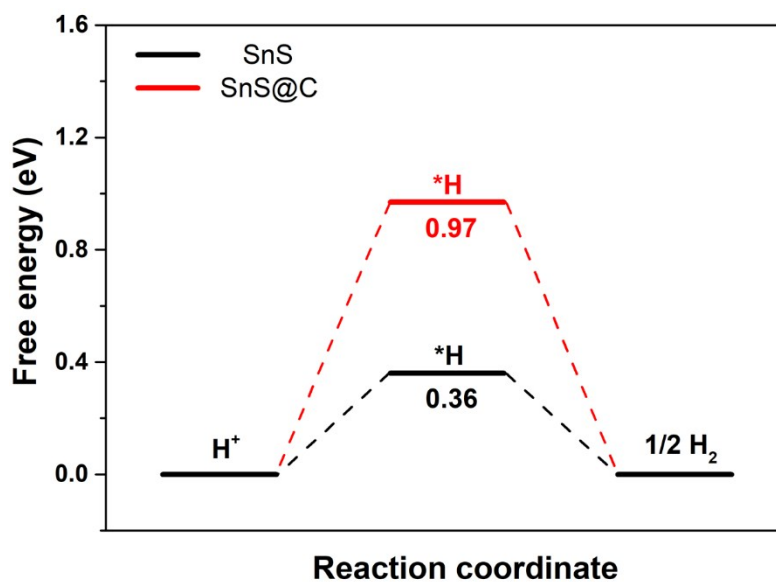

245

246 **Figure S30.** Free-energy diagrams of HER process on SnS and SnS@C (\* denotes the  
247 adsorption site).

248

249

250

251

252

253

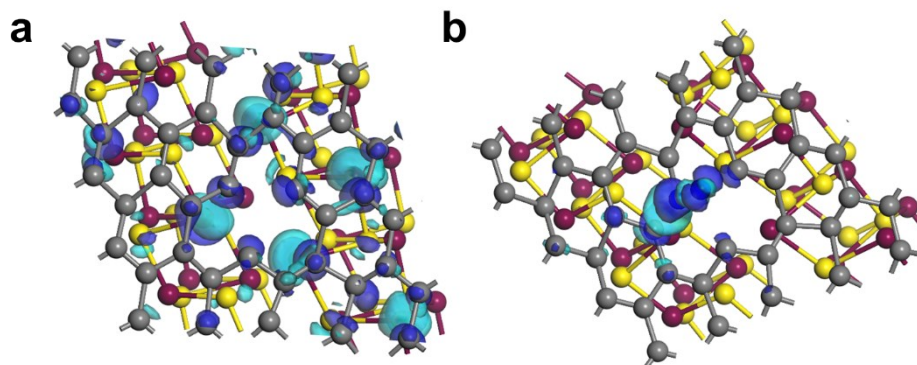

254

255

256

257

258 **Figure S31.** Top view of a) Charge density difference of SnS@C; b) Charge density  
259 difference of SnS@C after N<sub>2</sub> adsorption on SnS (111) surface. (Wathet and mazarine  
260 blue isosurfaces represent charge accumulation and depletion, respectively)

261

262

263

264

|                 | ZPE (eV) | ∫C <sub>p</sub> dT (eV) | -TS (eV) |
|-----------------|----------|-------------------------|----------|
| *NNH            | 0.50     | 0.06                    | -0.10    |
| *NNHH           | 0.77     | 0.09                    | -0.18    |
| *N              | 0.09     | 0.02                    | -0.03    |
| *NH             | 0.39     | 0.03                    | -0.04    |
| *NHH            | 0.65     | 0.04                    | -0.07    |
| NH <sub>3</sub> | 0.85     | 0.10                    | -0.60    |
| N <sub>2</sub>  | 0.14     | 0.09                    | -0.40    |
| H <sub>2</sub>  | 0.27     | 0.09                    | -0.42    |

265

266 **Table S1.** The correction of zero-point energy, enthalpy effect, and entropy effect of  
267 the adsorbed and gaseous species.

268

269

270

| Samples           | SnS   | SnS@C |
|-------------------|-------|-------|
| $m_s/m_{Sn}^a$    | 0.286 | 0.285 |
| $n_s/n_{Sn}^a$    | 1.05  | 1.03  |
| $n_s/n_{Sn}^b$    | 1.13  | 1.08  |
| $Sn^{4+}/Sn^{2+}$ | 1.88  | 0.74  |

271

272  $m_s/m_{Sn}$  is the mass ratio of the S and Sn on SnS and SnS@C;

273  $n_s/n_{Sn}$  is the molar ratio of S and Sn elements on SnS and SnS@C;

274 <sup>a</sup> Results measured by EDX analysis;

275 <sup>b</sup> Results measured by XPS analysis.

276 **Table S2.** Chemical compositions of SnS and SnS@C

277

278

| Samples | C %          |             | H %          |             | S %          |             |
|---------|--------------|-------------|--------------|-------------|--------------|-------------|
|         | before tests | after tests | before tests | after tests | before tests | after tests |
| SnS     | 4.2          | 4.26        | 0.84         | 0.94        | 21.68        | 20.86       |
| SnS@C   | 7.07         | 7.14        | 1.15         | 1.22        | 20.8         | 20.62       |

279 **Table S3.** Chemical composition determined by an elemental analyzer.

280

281

282

| Samples | $R_s/\Omega$ | $R_{ct}/\Omega$ |
|---------|--------------|-----------------|
| SnS     | 78.73        | 236.48          |
| SnS@C   | 34.57        | 120.25          |

283 **Table S4.** Simulated values of fitted equivalent circuit resistances of SnS and SnS@C.

| Catalyst                              | System                                | NH <sub>3</sub> yield rate                                          | FE (%)        | References       |
|---------------------------------------|---------------------------------------|---------------------------------------------------------------------|---------------|------------------|
| <b>SnS@C microflowers</b>             | 0.1 M Na <sub>2</sub> SO <sub>4</sub> | 7.95×10 <sup>-11</sup> mol s <sup>-1</sup> cm <sup>-2</sup>         | 14.56         | <b>This work</b> |
| <b>Sn/SnS nanosheets</b>              | 0.1 M PBS                             | 3.89×10 <sup>-11</sup> mol s <sup>-1</sup> cm <sup>-2</sup> (-0.8V) | 6.5 (-0.7V)   | <b>1</b>         |
| <b>SnO<sub>2</sub>/RGO</b>            | 0.1 M Na <sub>2</sub> SO <sub>4</sub> | 8.33×10 <sup>-11</sup> mol s <sup>-1</sup> cm <sup>-2</sup>         | 7.1           | <b>2</b>         |
| <b>Sn dendrite/Sn foil</b>            | 0.1 M PBS                             | 5.66×10 <sup>-11</sup> mol s <sup>-1</sup> cm <sup>-2</sup>         | 3.67          | <b>3</b>         |
| <b>NiCoS/C</b>                        | 0.1 M Li <sub>2</sub> SO <sub>4</sub> | 2.60 ug h <sup>-1</sup> cm <sup>-2</sup>                            | 12.9          | <b>4</b>         |
| <b>Co-FePS<sub>3</sub> nanosheets</b> | 0.1 M KOH                             | 90.6 ug h <sup>-1</sup> mg <sub>cat</sub> <sup>-1</sup> (0.04 mg)   | 3.38          | <b>5</b>         |
| <b>Fe-MoS<sub>2</sub>/CC</b>          | 0.1 M KOH                             | 12.5 ug h <sup>-1</sup> cm <sup>-2</sup>                            | 10.8          | <b>6</b>         |
| <b>FeS<sub>2</sub></b>                | 0.1 M Na <sub>2</sub> SO <sub>4</sub> | 37.2 ug h <sup>-1</sup> mg <sub>cat</sub> <sup>-1</sup> (0.2 mg)    | 11.2          | <b>7</b>         |
| <b>CoS<sub>2</sub>@NC/CP</b>          | 0.1 M HCl                             | 17.45 ug h <sup>-1</sup> mg <sub>cat</sub> <sup>-1</sup> (0.1 mg)   | 4.6           | <b>8</b>         |
| <b>Porous Au film</b>                 | 0.1 M Na <sub>2</sub> SO <sub>4</sub> | 9.42 ug cm <sup>-2</sup> h <sup>-1</sup>                            | 13.36         | <b>9</b>         |
| <b>WS<sub>2</sub>/WO<sub>2</sub></b>  | 0.05 M H <sub>2</sub> SO <sub>4</sub> | 8.53 ug h <sup>-1</sup> mg <sub>cat</sub> <sup>-1</sup> (0.02 mg)   | 13.5          | <b>10</b>        |
| <b>Ni-Fe@MoS<sub>2</sub></b>          | 0.1 M Na <sub>2</sub> SO <sub>4</sub> | 128.17 ug h <sup>-1</sup> mg <sub>cat</sub> <sup>-1</sup> (0.05 mg) | 11.34 (40 °C) | <b>11</b>        |
| <b>Pd-Ag-S</b>                        | 0.1 M Na <sub>2</sub> SO <sub>4</sub> | 9.73 ug h <sup>-1</sup> mg <sub>cat</sub> <sup>-1</sup> (0.1 mg)    | 18.41         | <b>12</b>        |
| <b>MoS<sub>2</sub>-rGO/CP</b>         | 0.1 M LiClO <sub>4</sub>              | 24.82 ug h <sup>-1</sup> mg <sup>-1</sup>                           | 4.58          | <b>13</b>        |
| <b>Ag<sub>3</sub>Cu BPNs</b>          | 0.1 M Na <sub>2</sub> SO <sub>4</sub> | 9.84 ug h <sup>-1</sup> cm <sup>-2</sup>                            | 13.28         | <b>14</b>        |
| <b>PTCA-rGO</b>                       | 0.1M HCl                              | 24.7 ug h <sup>-1</sup> mg <sup>-1</sup>                            | 6.9           | <b>15</b>        |

|                                    |                                       |                                          |     |           |
|------------------------------------|---------------------------------------|------------------------------------------|-----|-----------|
| <b>Mn<sub>3</sub>O<sub>4</sub></b> | 0.1 M Na <sub>2</sub> SO <sub>4</sub> | 11.6 ug h <sup>-1</sup> mg <sup>-1</sup> | 3.0 | <b>16</b> |
|------------------------------------|---------------------------------------|------------------------------------------|-----|-----------|

|               |                                       |                                                            |      |           |
|---------------|---------------------------------------|------------------------------------------------------------|------|-----------|
| <b>FePc/C</b> | 0.1 M Na <sub>2</sub> SO <sub>4</sub> | 137.95 ug mg <sub>FePc</sub> <sup>-1</sup> h <sup>-1</sup> | 10.5 | <b>17</b> |
|---------------|---------------------------------------|------------------------------------------------------------|------|-----------|

---

285

286 **Table S5.** The comparable table of state-of-the-art NRR catalysts.

287

288



289 **Reference**

- 290 1. P. Li, W. Fu, P. Zhuang, Y. Cao, C. Tang, A. B. Watson, P. Dong, J. Shen and M.  
291 Ye, *Small*, 2019, **15**, e1902535.
- 292 2. K. Chu, Y.-p. Liu, Y.-b. Li, J. Wang and H. Zhang, *ACS Applied Materials &*  
293 *Interfaces*, 2019, **11**, 31806-31815.
- 294 3. X. Lv, F. Wang, J. Du, Q. Liu, Y. Luo, S. Lu, G. Chen, S. Gao, B. Zheng and X.  
295 Sun, *Sustainable Energy & Fuels*, 2020, DOI: 10.1039/d0se00828a.
- 296 4. X. Wu, Z. Wang, Y. Han, D. Zhang, M. Wang, H. Li, H. Zhao, Y. Pan, J. Lai and  
297 L. Wang, *Journal of Materials Chemistry A*, 2020, **8**, 543-547.
- 298 5. H. Huang, F. Li, Q. Xue, Y. Zhang, S. Yin and Y. Chen, *Small*, 2019, **15**,  
299 e1903500.
- 300 6. X. Zhao, X. Zhang, Z. Xue, W. Chen, Z. Zhou and T. Mu, *Journal of Materials*  
301 *Chemistry A*, 2019, **7**, 27417-27422.
- 302 7. H. Du, C. Yang, W. Pu, L. Zeng and J. Gong, *ACS Sustainable Chemistry &*  
303 *Engineering*, 2020, **8**, 10572-10580.
- 304 8. P. Wei, H. Xie, X. Zhu, R. Zhao, L. Ji, X. Tong, Y. Luo, G. Cui, Z. Wang and X.  
305 Sun, *ACS Sustainable Chemistry & Engineering*, 2019, **8**, 29-33.
- 306 9. H. Wang, H. Yu, Z. Wang, Y. Li, Y. Xu, X. Li, H. Xue and L. Wang, *Small*,  
307 2019, **15**, 1804769.
- 308 10. Y. Ling, F. M. D. Kazim, S. Ma, Q. Zhang, K. Qu, Y. Wang, S. Xiao, W. Cai and  
309 Z. Yang, *Journal of Materials Chemistry A*, 2020, **8**, 12996-13003.
- 310 11. L. Zeng, X. Li, S. Chen, J. Wen, W. Huang and A. Chen, *Journal of Materials*  
311 *Chemistry A*, 2020, **8**, 7339-7349.
- 312 12. H. Wang, S. Liu, H. Zhang, S. Yin, Y. Xu, X. Li, Z. Wang and L. Wang,  
313 *Nanoscale*, 2020, **12**, 13507-13512.
- 314 13. X. Li, X. Ren, X. Liu, J. Zhao, X. Sun, Y. Zhang, X. Kuang, T. Yan, Q. Wei and  
315 D. Wu, *Journal of Materials Chemistry A*, 2019, **7**, 2524-2528.
- 316 14. H. Yu, Z. Wang, D. Yang, X. Qian, You. Xu, X. Li, H. Wang, L. Wang, *Journal*  
317 *of Materials Chemistry A*, 2019, **7**, 20, 12526-12531.
- 318 15. P. Li, J. Wang, H. Chen, X. Sun, J. You, S. Liu, Y. Zhang, M. Liu, X. Niu and Y.  
319 Luo, *Journal of Materials Chemistry A*, 2019, **7**, 12446-12450.
- 320 16. X. Wu, L. Xia, Y. Wang, W. Lu, Q. Liu, X. Shi and X. Sun, *Small*, 2018, **14**,  
321 e1803111.

322 17. C. He, Z.-Y. Wu, L. Zhao, M. Ming, Y. Zhang, Y. Yi and J.-S. Hu, *ACS*  
323 *Catalysis*, 2019, **9**, 7311-7317.
